# Supplementary material for: Return of participant-level clinical trial results to participants: pilot of a simplified centralised approach
Source: HighWire-hosted journal article supplement (doi:10.1136/bmjopen-2023-080097), 2024-03-01
Supplement: bmjopen-2023-080097supp002_data_supplement.pdf [file bmjopen-2023-080097supp002_data_supplement.pdf]

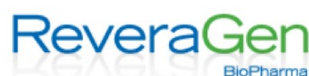

**CONSENT FOR THE PROCESSING OF PERSONAL DATA FROM THE EUROPEAN UNION TO FACILITATE RETURN OF RESULTS PER PROTOCOL VBP15-ROR/WIRB PROTOCOL 20192458**

1. Pursuant to the European Union General Data Protection Regulation ("EU GDPR"), Reveragen BioPharma ("Reveragen"), in its capacity as a data controller and/or processor under the EU GDPR, must obtain your explicit, affirmative, and informed consent before it can collect or process any personal data.
2. Per protocol, return of data will be facilitated through Reveragen's coordinator. Personal information including your child's date of birth, study site, your home address, and phone number will need to be provided to the coordinator.
3. You have the right to withdraw your consent to the processing of your above personal data at any time. However, refusal of consent may make it impossible for Reveragen to carry out the activity of returning data. **If you would like to withdraw consent, please contact the Study Coordinator, Suzanne Gaglianone at [suzanne.gaglianone@reveragen.com](mailto:suzanne.gaglianone@reveragen.com) or 1-609-206-0939.**
4. Reveragen is committed to ensuring the security of your information.

Having read this notice (items 1-4), I, \_\_\_\_\_, the  
[Print Full Name Here]

undersigned, hereby:

☐ give consent

☐ does not give consent

for the use of the following personal data (of my child and/or myself) for the sole purpose of facilitating the process described in item 2 above.

Son's date of birth : \_\_\_\_\_

Mailing Address: \_\_\_\_\_

Phone Number: \_\_\_\_\_

Signature: \_\_\_\_\_

Date [Month/Day/Year]: \_\_\_\_\_
